# Supplementary material
Source: publisher site journal article supplement (https://static.cambridge.org/content/id/urn:cambridge.org:id:article:S0899823X20004225/resource/name/S0899823X20004225supp001.docx)
Supplement: Supplementary file 1 [file S0899823X20004225supp001.docx]

**Appendix C.** Proportion of assessments with conditions of interest in 2012 vs. 2016,** adjusted for seasonality (calendar month) and NH cluster standard errors.

|  | All *(regardless of cognitive status)* | | | | All ADRD | | | | ADRD with ACI | | | | ADRD without ACI | | | |
| --- | --- | --- | --- | --- | --- | --- | --- | --- | --- | --- | --- | --- | --- | --- | --- | --- |
|  | AOR | 95% CI | | | AOR | 95% CI | | | AOR | | 95% CI | | AOR | | 95% CI | |
| All *(regardless of infection status)* | - | | - | - | 1.11* | | 1.08 | 1.14 | 1.03 | 0.99 | | 1.07 | 1.09* | 1.06 | | 1.12 |
| Any infection | 0.70* | | 0.66 | 0.73 | 0.69* | | 0.66 | 0.73 | 0.65* | 0.60 | | 0.71 | 0.71* | 0.67 | | 0.74 |
| MDRO | 0.76* | | 0.65 | 0.90 | 0.72* | | 0.60 | 0.86 | 0.74* | 0.57 | | 0.98 | 0.71* | 0.59 | | 0.85 |
| Pneumonia | 0.96 | | 0.89 | 1.03 | 0.96 | | 0.88 | 1.05 | 0.88 | 0.77 | | 1.02 | 0.99 | 0.89 | | 1.09 |
| Septicemia | 2.59* | | 2.21 | 3.03 | 2.40* | | 2.00 | 2.89 | 2.46* | 1.77 | | 3.42 | 2.38* | 1.95 | | 2.91 |
| UTI | 0.56* | | 0.53 | 0.59 | 0.58* | | 0.54 | 0.61 | 0.53* | 0.48 | | 0.59 | 0.59* | 0.55 | | 0.63 |
| No Infection | 1.44* | | 1.37 | 1.50 | 1.18* | | 1.15 | 1.21 | 1.07* | 1.02 | | 1.11 | 1.15* | 1.12 | | 1.18 |
| Any Infection Except UTI | 0.99 | | 0.92 | 1.06 | 0.98 | | 0.91 | 1.06 | 0.89 | 0.79 | | 1.00 | 1.00 | 0.92 | | 1.09 |

Note: *Statistically significant at alpha = .05; **Represents a 10% random sample of CMS-certified U.S. NHs’ assessments, 2012 includes April 1st 2012- December 31st 2012 and 2016 includes January 1st 2016 -November 30th 2016 as per consistently defined variables and data availability.

AOR, Adjusted Odds Ratio; CI: Confidence Interval; “All” represents all quarterly and annual resident assessments; ADRD, Alzheimer's Disease or Related Dementia; ACI, advanced cognitive impairment; MDRO, multidrug-resistant infection; UTI, urinary tract infection.
